# Supplementary material for: Injectable leonurine nanocrystal-loaded microspheres for long-term hyperlipidemia management
Source: Royal Society of Chemistry journal article supplement (doi:10.1039/d3bm00211j), 2023-01-01
Supplement: d3bm00211j1.pdf [file d3bm00211j1.pdf]

## Supplementary information

# **Injectable Leonurine Nanocrystals-loaded Microspheres for Long-term Hyperlipidemia Management**

Zhiling Song <sup>a#</sup>, Shiyu Meng <sup>a#</sup>, Zhuang Tang <sup>a</sup>, Xiaoxue Yang <sup>a</sup>, He Yuan <sup>b</sup>, Zheng Ying <sup>b</sup>, Hui Guo <sup>c</sup>, Meirong Du <sup>a,d</sup>, Yizhun Zhu <sup>a\*</sup>, Xiaolin Wang <sup>a\*</sup>

<sup>a</sup> School of Pharmacy and State Key Laboratory of Quality Research in Chinese Medicine, Macau University of Science and Technology, Macao 999078, China

<sup>b</sup> State Key Laboratory of Quality Research in Chinese Medicine, Institute of Chinese Medical Sciences, University of Macau, Macau 999078, China

<sup>c</sup> School of Chemical Engineering and Technology, Sun Yat-sen University, Zhuhai 519082, China

<sup>d</sup> NHC Key Lab of Reproduction Regulation (Shanghai Institute of Planned Parenthood Research), Shanghai Key Laboratory of Female Reproductive Endocrine Related Diseases, Hospital of Obstetrics and Gynecology, Fudan University Shanghai Medical College, Shanghai 200032, China

\* Corresponding authors: yzzhu@must.edu.mo (Y. Zhu), xilwang@must.edu.mo (X. Wang)

# These authors contributed equally to this work.

## Supplementary experimental

*Similarity factor ( $f_2$ ) analysis:* Comparison among the dissolution profiles of selected formulations was performed by calculating the similarity factor ( $f_2$ ):

$$f_2 = 50 \log \left\{ \left( 1 + \frac{1}{n} \sum_{t=1}^n (R_t - T_t)^2 \right)^{-0.5} \times 100 \right\} \#$$

where  $n$  is the sampling number,  $T_t$  and  $R_t$  are the percentages of release for the test and reference group at each time point  $t$ .  $f_2$  factor is 100 when the test and reference profiles are identical, and approaches 0 as the dissimilarity increases.

*Drug release mechanism exploration:* The weight fraction of drugs released with time follows a power law relationship. For all groups, % cumulative drug release (% M) was fitted to the following kinetic equations: (i) Ritger-Peppas: plotted as log of % M versus log time, (ii) Zero order: plotted as % M versus time, (iii) First order: plotted as log % M retained versus time, and (iv) Higuchi, plotted as % M versus square root of time, the corresponding equation was listed as follows:

$$\text{Ritger-Peppas} \quad \frac{M_\infty}{M_t} = at^n \quad (\text{ii})$$

$$\text{First order} \quad M_\infty = M_t e^{-k_1 t} \quad (\text{iii})$$

$$\text{Zero order} \quad M_t = K_0 t \quad (\text{iv})$$

$$\text{Higuchi} \quad M_t = k_H \sqrt{t} \quad (\text{v})$$

where  $M_t$  is the cumulative amount of drug released at time  $t$ ,  $M_\infty$  is the total amount of drug in the matrix,  $k_0$  is the zero-order rate constant,  $k_1$  is the first-order release constant, and  $k_H$  is the Higuchi model-based release constant. The regression coefficient ( $R^2$ ) values obtained in various models were compared to get the most fitted kinetic model.

The results were listed in **Table S1**.

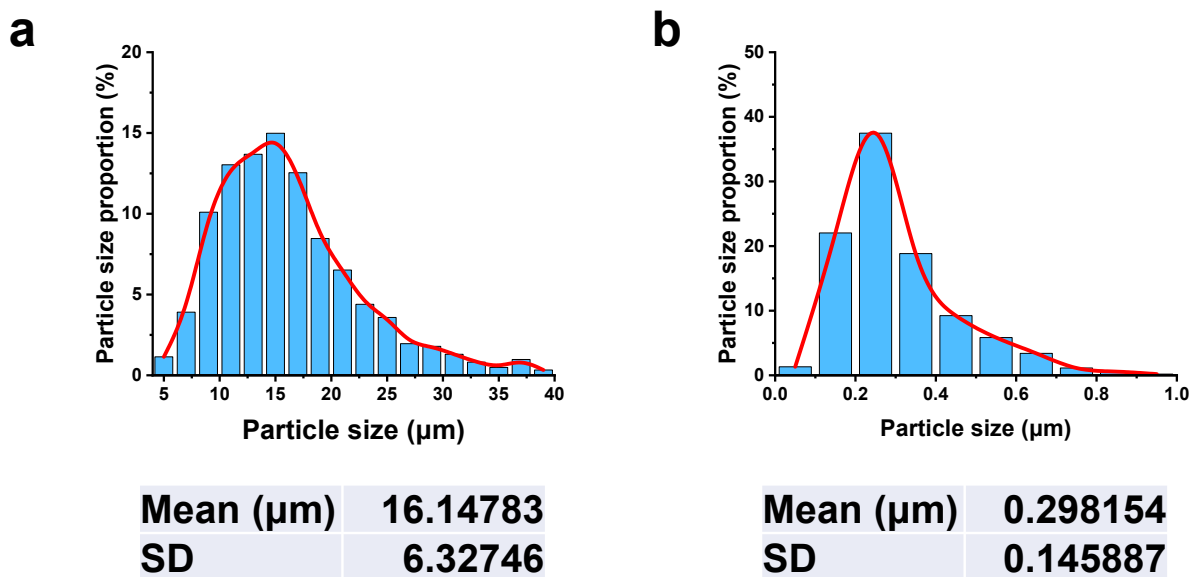

**Fig. S1.** Size distribution of Leo-micro and Leo-nano quantified by Image J.

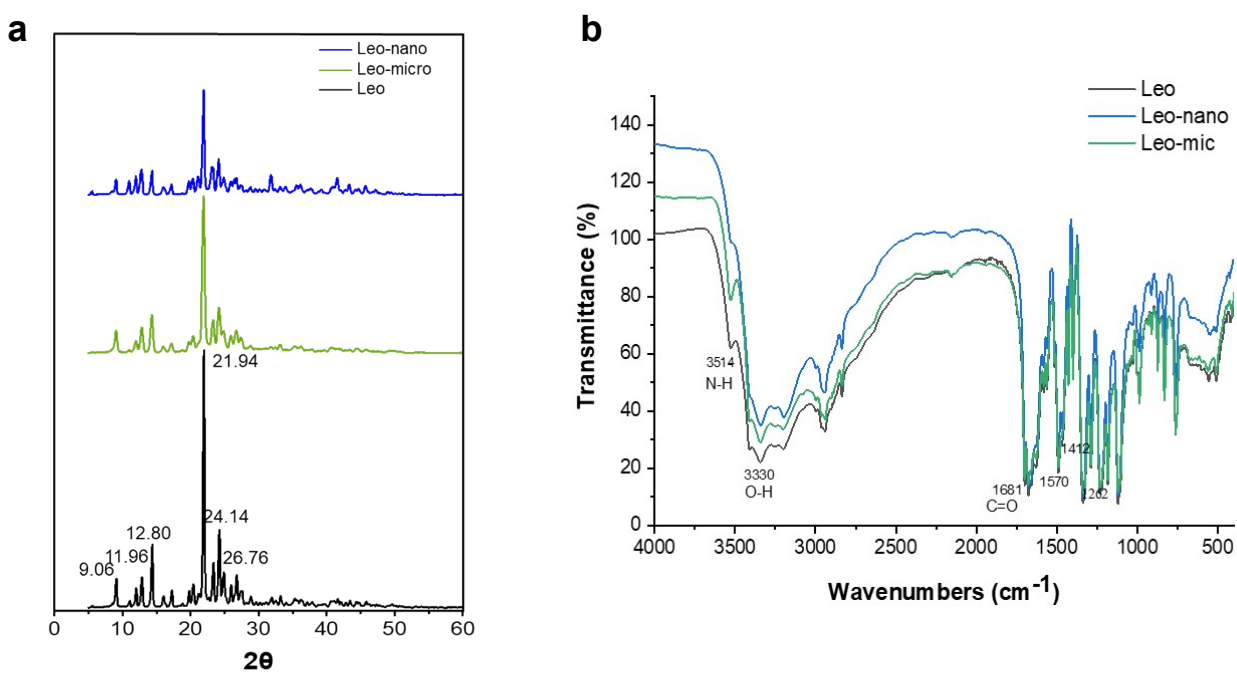

**Fig. S2.** (a) XRD and (b) FT-IR spectra of Leo, Leo-micro, and Leo-nano.

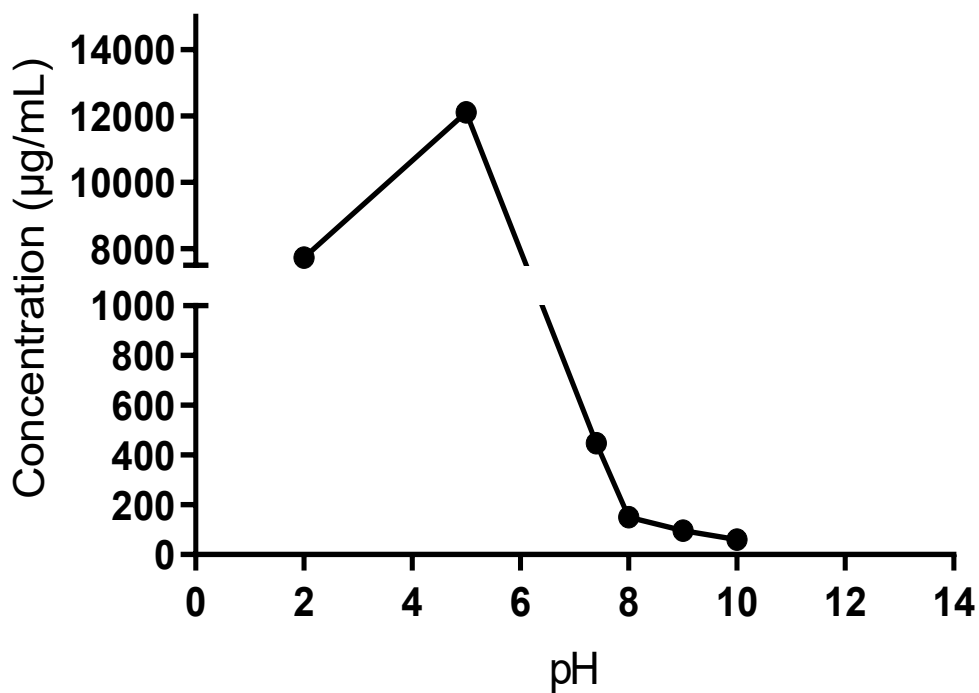

Fig. S3. pH dependent-solubility of Leo in aqueous media.

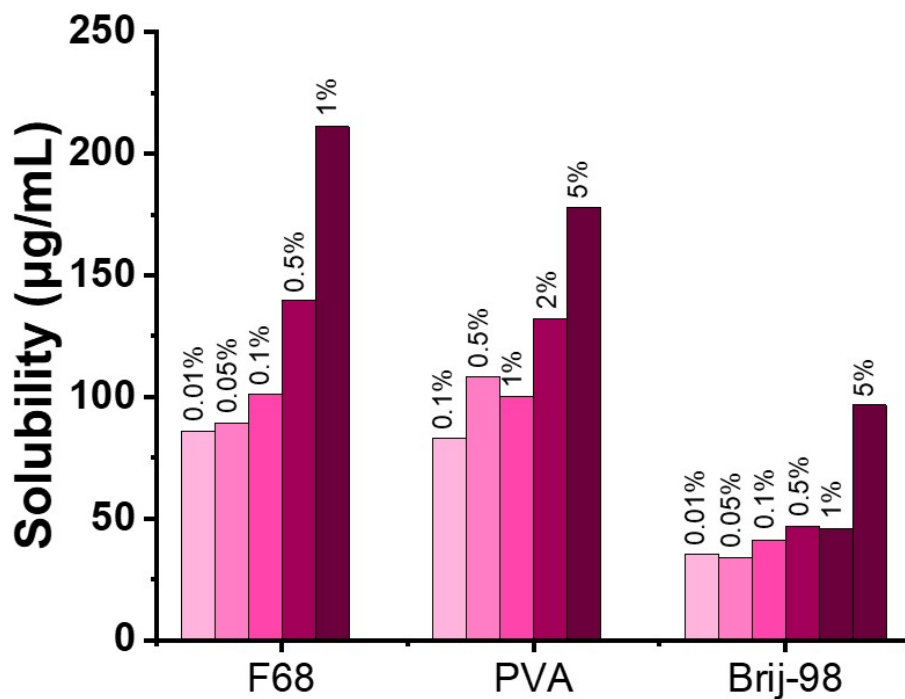

Fig. S4. Impact of surfactant type and concentration on the solubility of Leo in aqueous media.

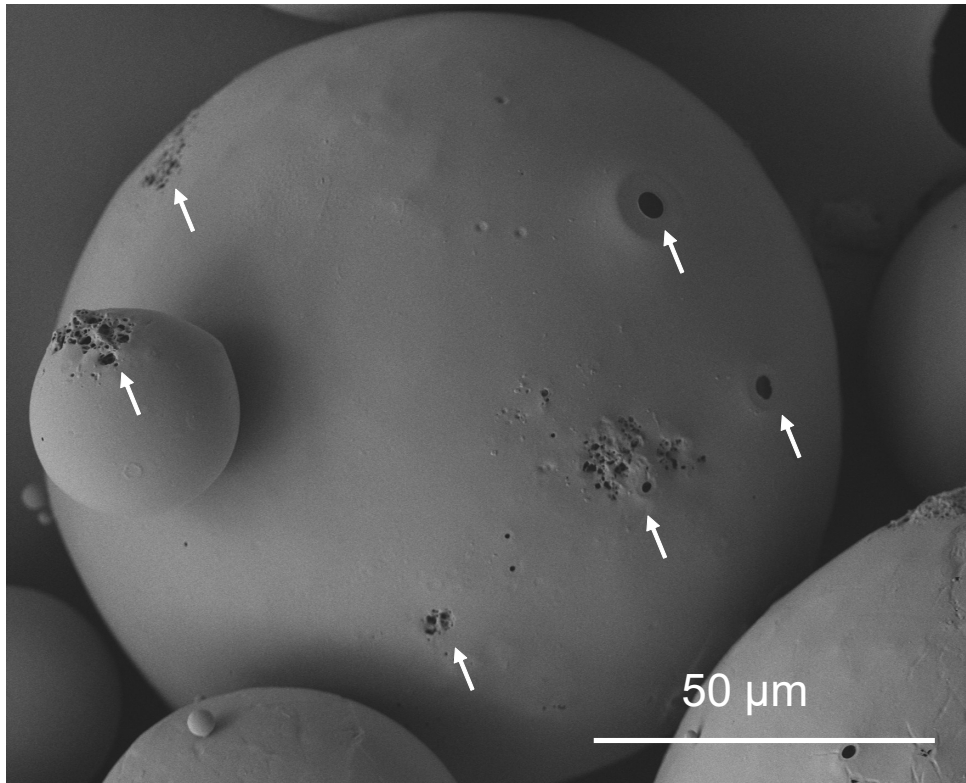

**Fig. S5.** SEM image of Leo-nano loaded microspheres prepared without additives.

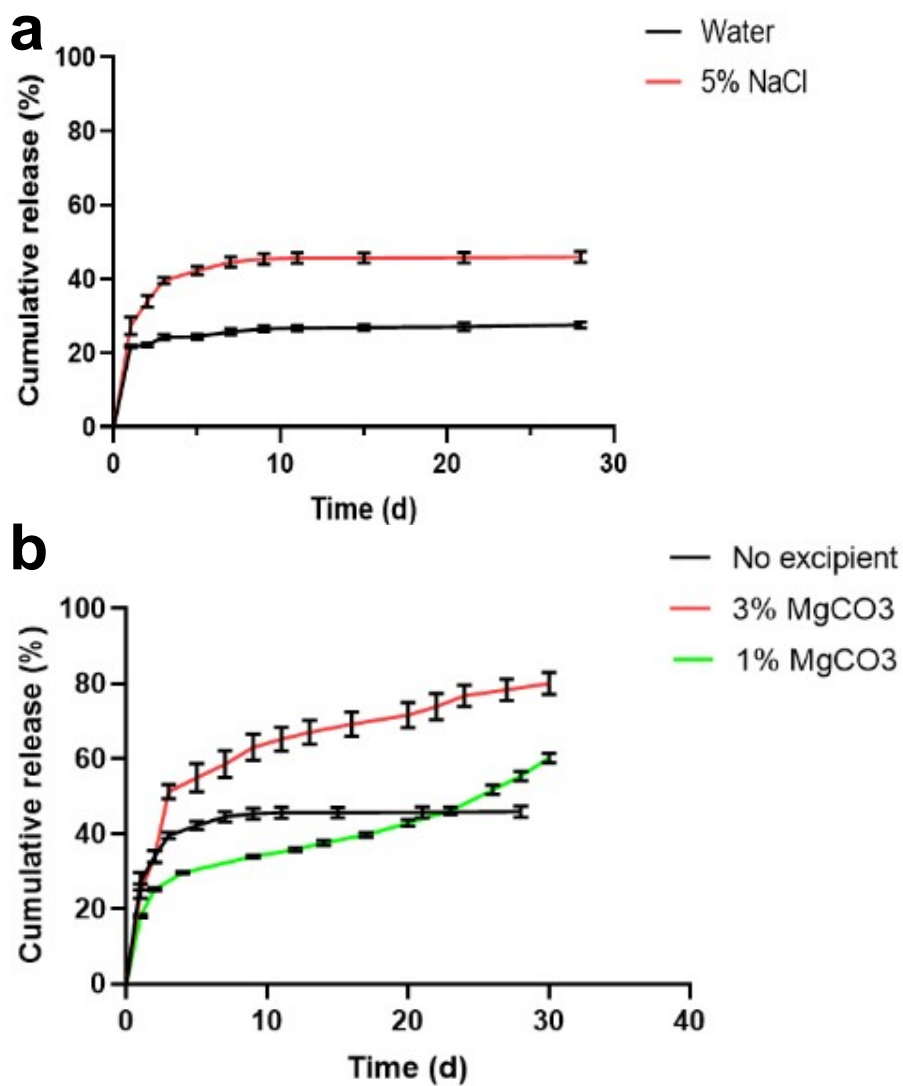

**Fig. S6.** Preparation of Leo-micro loaded microspheres. Impact of (a) osmotic pressure and (b) MgCO<sub>3</sub> on drug release kinetics. Data were presented as mean  $\pm$  SD, n = 3.

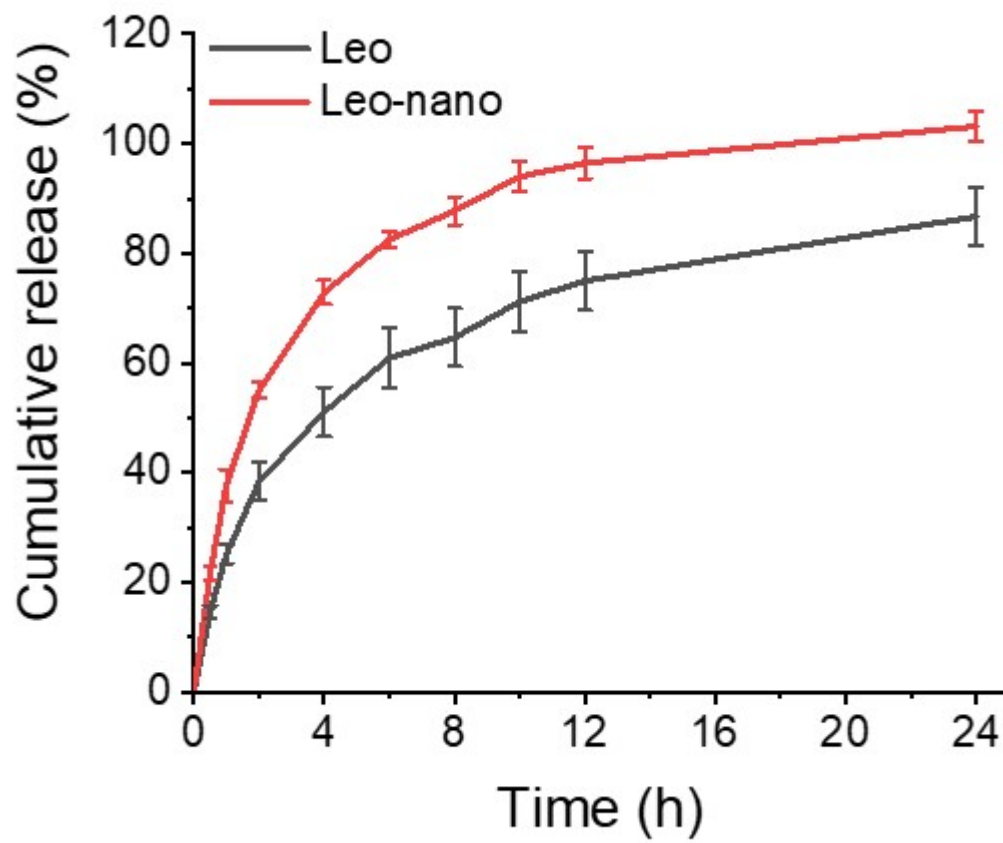

**Fig. S7.** Drug release profile of Leo and Leo-nano in PBS (10 mM, pH = 7.4). Data were presented as mean  $\pm$  SD, n = 3.

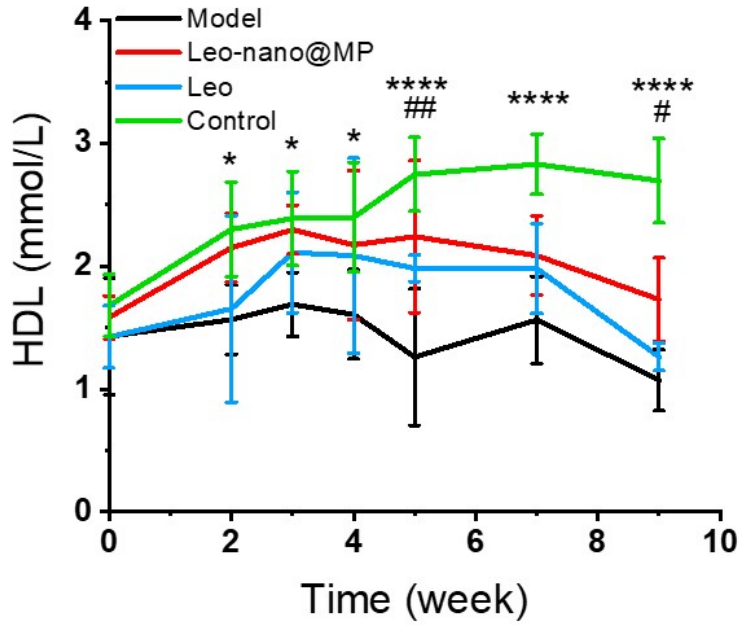

**Fig. S8.** HDL levels of HFD-fed rats with different treatments. Data were presented as mean  $\pm$  SD, n = 6. The variance between model and model (\*) and Leo-nano@MP (#) group was determined by one-way ANOVA with Dunnett's post-hoc test (\* $p$  < 0.05, \*\* $p$  < 0.01, \*\*\* $p$  < 0.001, \*\*\*\* $p$  < 0.0001; # $p$  < 0.05, ## $p$  < 0.01).



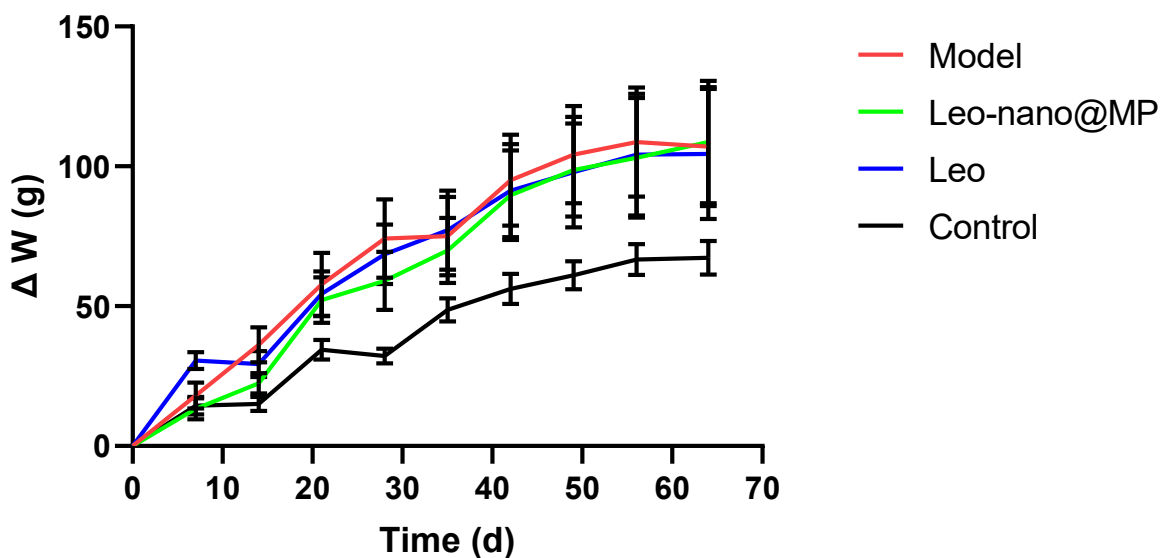

**Fig. S9.** Weight changes ( $\Delta W$ ) of rats after different treatments. Data were presented as mean  $\pm$  SD, n = 6.

**Table S1. Drug content after milling (n = 3)**

| Group     | Drug content (%) |
|-----------|------------------|
| Leo-nano  | 100.1 $\pm$ 1.2  |
| Leo-micro | 99.8 $\pm$ 0.7   |

**Table S2. Model Fitting of the drug release profile**

| Group                         | Equation                 | R <sup>2</sup> | n    |
|-------------------------------|--------------------------|----------------|------|
| Leo-nano@MP<br>(NO additives) | Y=6.11X <sup>0.38</sup>  | 0.9745         | 0.38 |
| Leo-nano                      | Y=99.27X <sup>0.45</sup> | 0.9502         | 0.45 |
